# Supplementary material for: A Study on the Clustering of Extra Virgin Olive Oils Extracted from Cultivars Growing in Four Ionian Islands (Greece) by Multivariate Analysis of Their Phenolic Profile, Antioxidant Activity and Genetic Markers
Source: MDPI journal article supplement (doi:10.3390/foods10123009), 2021-12-04
Supplement: s1 [file s1]

Supplementary Figure S2

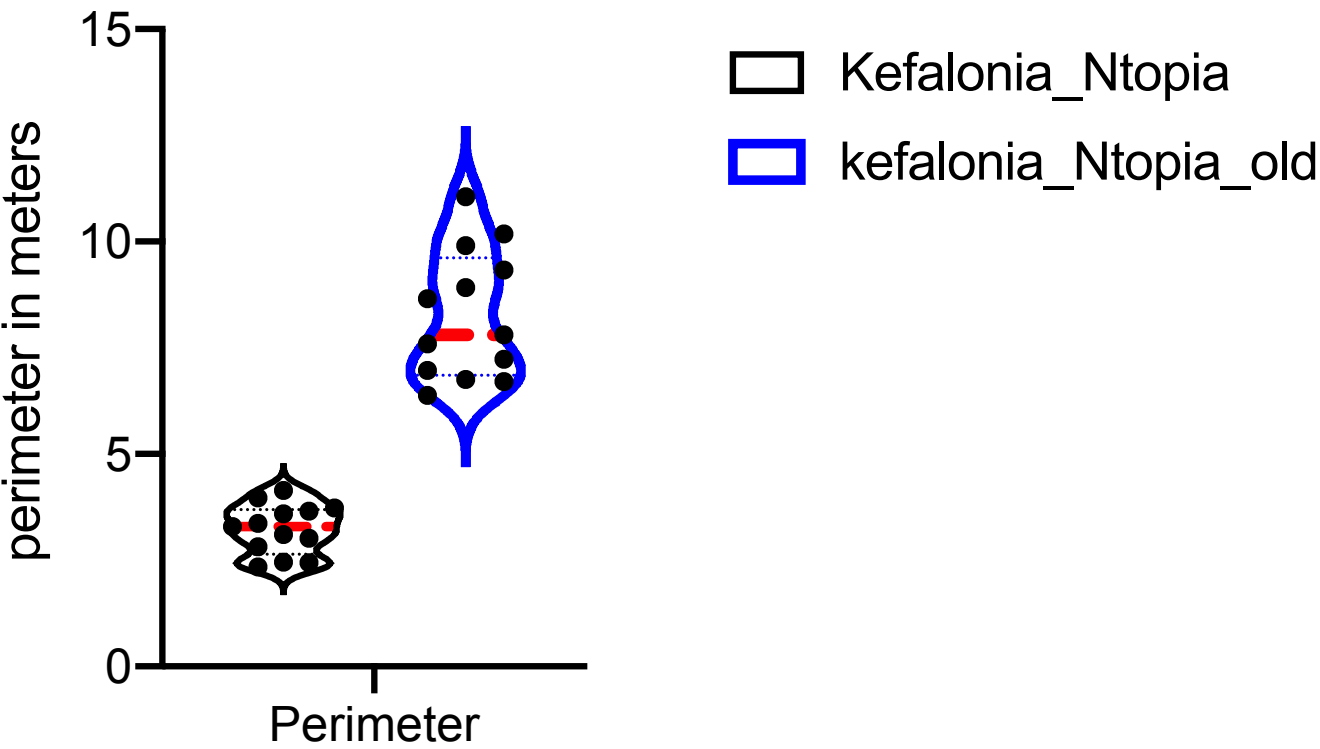

|                                          |                |
|------------------------------------------|----------------|
|                                          |                |
| Paired t test                            |                |
| P value                                  | <0.0001        |
| P value summary                          | ****           |
| Significantly different (P < 0.05)?      | Yes            |
| One- or two-tailed P value?              | Two-tailed     |
| t, df                                    | t=15.18, df=12 |
| Number of pairs                          | 13             |
|                                          |                |
| How big is the difference?               |                |
| Mean of differences (B - A)              | 5.042          |
| SD of differences                        | 1.197          |
| SEM of differences                       | 0.3321         |
| 95% confidence interval                  | 4.318 to 5.765 |
| R squared (partial eta squared)          | 0.9505         |
|                                          |                |
| How effective was the pairing?           |                |
| Correlation coefficient (r)              | 0.6749         |
| P value (one tailed)                     | 0.0057         |
| P value summary                          | **             |
| Was the pairing significantly effective? | Yes            |
