# Supplementary material for: A Study on the Clustering of Extra Virgin Olive Oils Extracted from Cultivars Growing in Four Ionian Islands (Greece) by Multivariate Analysis of Their Phenolic Profile, Antioxidant Activity and Genetic Markers
Source: Foods. 2021 Dec 4;10(12):3009. doi: 10.3390/foods10123009 (PMC8700953; doi:10.3390/foods10123009)
Supplement: Supplementary file 1 [file foods-10-03009-s001.zip]

Archive with 6 entries (6 files):
- Figure S1.pdf
- Figure S2.pdf
- Figure S3.pdf
- Table S1.xls
- Table S2.xlsx
- Table S3.xlsx
