# Supplementary material for: A Study on the Clustering of Extra Virgin Olive Oils Extracted from Cultivars Growing in Four Ionian Islands (Greece) by Multivariate Analysis of Their Phenolic Profile, Antioxidant Activity and Genetic Markers
Source: Foods. 2021 Dec 4;10(12):3009. doi: 10.3390/foods10123009 (PMC8700953; doi:10.3390/foods10123009)
Supplement: Supplementary file 1 [file foods-10-03009-s001.zip › Table S1.xls]

## Sheet: Phenols_sub6
Sample No.	Pop.	Antioxidant activity (mmol Trolox/l)	A (mg/Kg)	B (mg/Kg)	C (mg/Kg)	D (mg/Kg)	E (mg/Kg)	F (mg/Kg)	Trunk perimeter (m)
157	Kerkyra_Lianolia	2.4	357.66	280.33	18.26	4.3	16.745	4.57	ND	A=oleocanthal
158	Kerkyra_Lianolia	2.16	357.66	174.41	22.92	50.84	16.745	4.57	ND	B=oleacein
160	Kerkyra_Lianolia	1.99	305.52	161.44	39.21	4.3	21.615	4.57	ND	C=ligstroside aglycone
162	Kerkyra_Lianolia	2.58	357.66	260.88	11.28	4.3	16.745	4.57	ND	D=oleokoronal
163	Kerkyra_Lianolia	1.86	333.76	98.76	4.3	4.3	4.57	4.57	ND	E=oleuropein aglycone
167	Kerkyra_Lianolia	2.43	483.65	256.55	69.46	4.3	58.14	4.57	ND	F=oleomissional
170	Kerkyra_Lianolia	1.42	259.9	33.91	34.55	4.3	4.57	4.57	ND
171	Kerkyra_Lianolia	1.76	270.76	85.79	4.3	4.3	4.57	4.57	ND
174	Kerkyra_Lianolia	1.9	249.04	144.15	4.3	4.3	4.57	4.57	ND
177	Kerkyra_Lianolia	1.88	236.01	124.7	4.3	4.3	4.57	4.57	ND
178	Kerkyra_Lianolia	1.92	244.69	118.21	18.26	4.3	14.31	4.57	ND
183	Kerkyra_Lianolia	2.29	320.73	263.04	18.26	4.3	11.875	4.57	ND
185	Kerkyra_Lianolia	2.1	199.08	202.51	8.95	4.3	9.44	4.57	ND
188	Kerkyra_Lianolia	2.04	249.04	129.02	36.88	4.3	36.225	4.57	ND
203	Kerkyra_Lianolia	1.73	249.04	265.2	18.26	4.3	21.615	4.57	ND
225	Kerkyra_Lianolia	1.41	209.94	129.02	4.3	4.3	4.57	4.57	ND
226	Kerkyra_Lianolia	1.49	144.77	116.05	15.94	4.3	11.875	4.57	ND
228	Kerkyra_Lianolia	2.1	236.01	211.16	13.61	4.3	14.31	4.57	ND
230	Kerkyra_Lianolia	1.88	279.45	159.28	13.61	4.3	16.745	4.57	ND
231	Kerkyra_Lianolia	2.54	125.21	226.29	22.92	4.3	4.57	4.57	ND
52	Kefalonia_Ntopia	1.17	153.46	38.6	4.3	4.3	26.49	4.57	2.46
57	Kefalonia_Ntopia	1.7	23.11	23.1	34.55	116	53.27	111.71	3.37
59	Kefalonia_Ntopia	2.96	202.33	152.08	36.88	50.84	36.23	33.79	2.82
73	Kefalonia_Ntopia	1.91	187.85	89.03	15.94	4.3	11.88	4.57	2.44
77	Kefalonia_Ntopia	2.61	160.7	90.83	13.61	4.3	14.31	4.57	3.59
82	Kefalonia_Ntopia	1.34	124.49	33.19	32.22	41.53	11.88	4.57	2.34
85	Kefalonia_Ntopia	2.28	301.9	60.21	4.3	4.3	75.19	4.57	3.97
89	Kefalonia_Ntopia	1.59	193.28	7.97	22.92	4.3	19.18	4.57	3.65
91	Kefalonia_Ntopia	1.39	213.2	92.63	32.22	4.3	19.18	4.57	3.73
92	Kefalonia_Ntopia	0.94	227.68	36.79	53.17	4.3	4.57	4.57	3.29
94	Kefalonia_Ntopia	1.42	220.44	110.65	50.84	4.3	58.14	4.57	4.14
96	Kefalonia_Ntopia	1.48	198.71	80.03	29.9	4.3	9.44	4.57	3.11
224	Kefalonia_Ntopia	2.26	155.27	204.31	4.3	4.3	4.57	4.57	3.02
62	Kefalonia_Ntopia_old	1.6	343.54	96.24	46.19	41.53	19.18	4.57	6.71
74	Kefalonia_Ntopia_old	2.23	298.28	153.88	41.53	125.3	26.49	43.53	7.59
86	Kefalonia_Ntopia_old	2.2	207.76	211.52	46.19	134.61	58.14	92.23	8.92
93	Kefalonia_Ntopia_old	1.47	254.83	71.02	29.9	4.3	14.31	4.57	6.97
97	Kefalonia_Ntopia_old	1.83	312.76	207.92	53.17	4.3	67.88	4.57	10.18
99	Kefalonia_Ntopia_old	2.3	213.2	105.24	18.26	4.3	16.75	4.57	6.75
217	Kefalonia_Ntopia_old	2.85	267.5	287.17	32.22	4.3	50.84	4.57	11.05
218	Kefalonia_Ntopia_old	2.41	173.37	139.47	34.55	88.07	53.27	21.615	9.33
219	Kefalonia_Ntopia_old	1.53	310.95	135.87	39.21	88.07	36.23	19.18	6.38
220	Kefalonia_Ntopia_old	1.68	296.47	211.52	34.55	22.92	48.4	4.57	8.66
221	Kefalonia_Ntopia_old	2.48	253.02	260.16	27.57	69.46	53.27	19.18	9.9
222	Kefalonia_Ntopia_old	2.22	229.49	258.35	25.24	4.3	19.18	4.57	7.8
223	Kefalonia_Ntopia_old	2.32	238.54	195.31	29.9	60.15	41.1	43.53	7.23
102	Lefkada_asprolia	1.83	27.46	20.94	88.072	237	87.36	72.75	ND
104	Lefkada_asprolia	2.24	27.46	20.94	53.167	237	55.705	140.93	ND
107	Lefkada_asprolia	2.39	1.39	7.97	62.475	88.072	75.185	72.75	ND
109	Lefkada_asprolia	1.89	36.15	27.78	71.783	143.92	77.62	53.27	ND
111	Lefkada_asprolia	1.34	20.94	7.97	99.707	4.3	24.05	4.57	ND
113	Lefkada_asprolia	2.91	29.63	25.26	76.437	274.232	84.925	170.15	ND
114	Lefkada_asprolia	2.48	18.77	25.26	69.456	274.232	114.145	199.37	ND
116	Lefkada_asprolia	2.7	14.42	14.45	57.821	218.384	70.315	131.19	ND
117	Lefkada_asprolia	2.58	39.41	33.9	64.802	171.844	80.055	101.97	ND
119	Lefkada_asprolia	2.7	25.29	7.97	67.129	190.46	38.66	53.27	ND
120	Lefkada_asprolia	2.34	44.84	25.26	85.745	190.46	50.835	43.53	ND
121	Lefkada_asprolia	2.35	14.42	7.97	60.148	69.456	26.485	4.57	ND
122	Lefkada_asprolia	2.69	18.77	16.61	92.726	218.384	89.795	111.71	ND
123	Lefkada_asprolia	2.29	70.91	7.97	109.015	367.312	116.58	179.89	ND
124	Lefkada_asprolia	1.81	124.49	65.58	95.053	153.228	84.925	92.23	ND
126	Lefkada_asprolia	2.25	14.42	92.23	106.688	199.768	104.405	160.41	ND
127	Lefkada_asprolia	2.38	31.8	14.45	118.323	171.844	84.925	82.49	ND
128	Lefkada_asprolia	1.88	95.53	38.22	102.034	88.072	55.705	43.53	ND
129	Lefkada_asprolia	2.71	29.63	27.42	122.977	162.536	160.41	160.41	ND
130	Lefkada_asprolia	2.5	84.66	51.18	69.456	106.688	50.835	72.75	ND
131	Lefkada_asprolia	3.08	60.04	36.06	97.38	292.848	101.97	160.41	ND
132	Lefkada_asprolia	1.55	36.15	20.94	43.859	69.456	16.745	4.57	ND
133	Lefkada_asprolia	2.55	29.63	20.94	88.072	143.92	77.62	92.23	ND
135	Lefkada_asprolia	2.12	20.94	16.61	97.38	78.764	82.49	63.01	ND
136	Lefkada_asprolia	2.8	7.91	25.26	48.513	171.844	48.4	72.75	ND
139	Lefkada_asprolia	2.22	48.46	29.58	190.46	171.844	123.885	53.27	ND
141	Lefkada_asprolia	2.25	33.98	23.1	171.844	115.996	109.275	43.53	ND
145	Lefkada_asprolia	2.52	18.77	16.61	136.939	181.152	89.795	92.23	ND
146	Lefkada_asprolia	2.14	55.7	40.38	74.11	190.46	131.19	160.41	ND
147	Lefkada_asprolia	2.22	57.87	40.38	113.669	209.076	116.58	179.89	ND
149	Lefkada_asprolia	2.65	29.63	7.97	132.285	218.384	136.06	150.67	ND
151	Lefkada_asprolia	3.76	23.11	27.42	113.669	311.464	167.715	248.07	ND
152	Lefkada_asprolia	2.73	73.08	51.18	113.669	190.46	116.58	131.19	ND
153	Lefkada_asprolia	3.19	31.8	23.1	234.673	255.616	226.155	160.41	ND
154	Lefkada_asprolia	1.73	83.94	27.42	99.707	60.148	92.23	24.05	ND
2	Zakynthos_Ntopia	2.16	356.21	207.92	64.8	134.61	82.49	72.75	ND
3	Zakynthos_Ntopia	1.65	229.49	105.24	39.21	97.38	38.66	53.27	ND
4	Zakynthos_Ntopia	1.25	81.04	42.2	4.3	4.3	4.57	4.57	ND
5	Zakynthos_Ntopia	2.38	289.23	144.87	88.07	237	77.62	92.23	ND
7	Zakynthos_Ntopia	1.61	124.49	105.24	22.92	41.53	38.66	24.05	ND
8	Zakynthos_Ntopia	1.65	166.13	132.26	25.24	41.53	31.36	43.53	ND
10	Zakynthos_Ntopia	2.13	169.75	135.87	36.88	50.84	53.27	24.05	ND
11	Zakynthos_Ntopia	2.27	142.59	67.42	64.8	116	58.14	43.53	ND
12	Zakynthos_Ntopia	2.42	222.25	162.88	34.55	60.15	43.53	24.05	ND
13	Zakynthos_Ntopia	1.49	191.47	94.44	46.19	41.53	33.79	33.79	ND
14	Zakynthos_Ntopia	2.09	178.8	153.88	34.55	106.69	50.84	92.23	ND
15	Zakynthos_Ntopia	2.54	258.45	134.06	53.17	199.77	53.27	63.01	ND
16	Zakynthos_Ntopia	1.92	111.82	60.21	15.94	41.53	16.75	4.57	ND
17	Zakynthos_Ntopia	2.01	110.01	121.46	29.9	4.3	45.97	4.57	ND
21	Zakynthos_Ntopia	1.6	176.99	99.84	29.9	4.3	28.92	4.57	ND
23	Zakynthos_Ntopia	2.18	169.75	38.6	18.26	97.38	45.97	101.97	ND
26	Zakynthos_Ntopia	1.41	169.75	101.64	50.84	4.3	63.01	4.57	ND
27	Zakynthos_Ntopia	1.2	193.28	146.67	46.19	4.3	55.71	4.57	ND
28	Zakynthos_Ntopia	1.65	184.23	105.24	32.22	4.3	41.1	4.57	ND
33	Zakynthos_Ntopia	1.63	106.39	101.64	4.3	4.3	4.57	4.57	ND
35	Zakynthos_Ntopia	1.8	135.35	170.09	4.3	4.3	4.57	4.57	ND
39	Zakynthos_Ntopia	2.61	110.01	103.44	25.24	116	43.53	121.45	ND
