# Supplementary material for: A Study on the Clustering of Extra Virgin Olive Oils Extracted from Cultivars Growing in Four Ionian Islands (Greece) by Multivariate Analysis of Their Phenolic Profile, Antioxidant Activity and Genetic Markers
Source: Foods. 2021 Dec 4;10(12):3009. doi: 10.3390/foods10123009 (PMC8700953; doi:10.3390/foods10123009)
Supplement: Supplementary file 1 [file foods-10-03009-s001.zip › Table S2.xlsx]

## Sheet: Sheet1
Supplementary Table S2
Oligo name / EurofinsGenomics RAPD Kit	Sequense 5’-3’	Tm (oC)	Bands scored
OPJ/ Kit J	CTCCATGGGG	34	0
OPA1/ Kit A	CAGGCCCTTC	34	15
OPΑΗ-02/ Kit AH	CACTTCCGCT	32	0
OPX5/ Kit X	CCTTTCCCTC	32	0
OPX6/ Kit X	ACGCCAGAGG	34	0
