# Supplementary material for: A Study on the Clustering of Extra Virgin Olive Oils Extracted from Cultivars Growing in Four Ionian Islands (Greece) by Multivariate Analysis of Their Phenolic Profile, Antioxidant Activity and Genetic Markers
Source: Foods. 2021 Dec 4;10(12):3009. doi: 10.3390/foods10123009 (PMC8700953; doi:10.3390/foods10123009)
Supplement: Supplementary file 1 [file foods-10-03009-s001.zip › Table S3.xlsx]

## Sheet: Sheet1
Supplementary Data Table S3
Data presented in this table are relevant to the genetic analysis reported in the main part of the manuscript
Section A
Total Band Patterns for Binary (Haploid) Data by Populations
Population	Kefalonia_Ntopia	Kefalonia_Ntopia_old	Kerkyra_Lianolia	Lefkada_asprolia	Zakynthos_Ntopia
No. Bands	14	15	15	15	13
No. Bands Freq. >= 5%	14	15	15	15	13
No. Private Bands	0	0	0	0	0
No. LComm Bands (<=25%)	0	0	0	0	0
No. LComm Bands (<=50%)	0	0	0	0	0
Mean h	0.359184	0.365432	0.409524	0.405208	0.315259
SE of Mean h	0.0354488	0.0469229	0.0233724	0.0254798	0.0429362
Mean uh	0.419048	0.411111	0.441026	0.432222	0.337778
SE of Mean uh	0.041357	0.0527882	0.0251702	0.0271785	0.0460031
No. Bands = No. of Different Bands
No. Bands Freq. >= 5% = No. of Different Bands with a Frequency >= 5%
No. Private Bands = No. of Bands Unique to a Single Population
No. LComm Bands (<=25%) = No. of Locally Common Bands (Freq. >= 5%) Found in 25% or Fewer Populations
No. LComm Bands (<=50%) = No. of Locally Common Bands (Freq. >= 5%) Found in 50% or Fewer Populations
h = Diversity = 1 - (p^2 + q^2)
uh = Unbiased Diversity = (N / (N-1)) * h
Where for Haploid Binary data, p = Band Freq. and q = 1 - p.
Section B
Percentage of Polymorphic Loci
Population	%P
Kefalonia_Ntopia	0.933333
Kefalonia_Ntopia_old	0.866667
Kerkyra_Lianolia	1
Lefkada_asprolia	1
Zakynthos_Ntopia	0.866667
Mean	0.933333
SE	0.0298142
