# Supplementary figures and images for: A Study on the Clustering of Extra Virgin Olive Oils Extracted from Cultivars Growing in Four Ionian Islands (Greece) by Multivariate Analysis of Their Phenolic Profile, Antioxidant Activity and Genetic Markers
Source: MDPI journal article supplement (doi:10.3390/foods10123009), 2021-12-04

Supplementary Figure S3

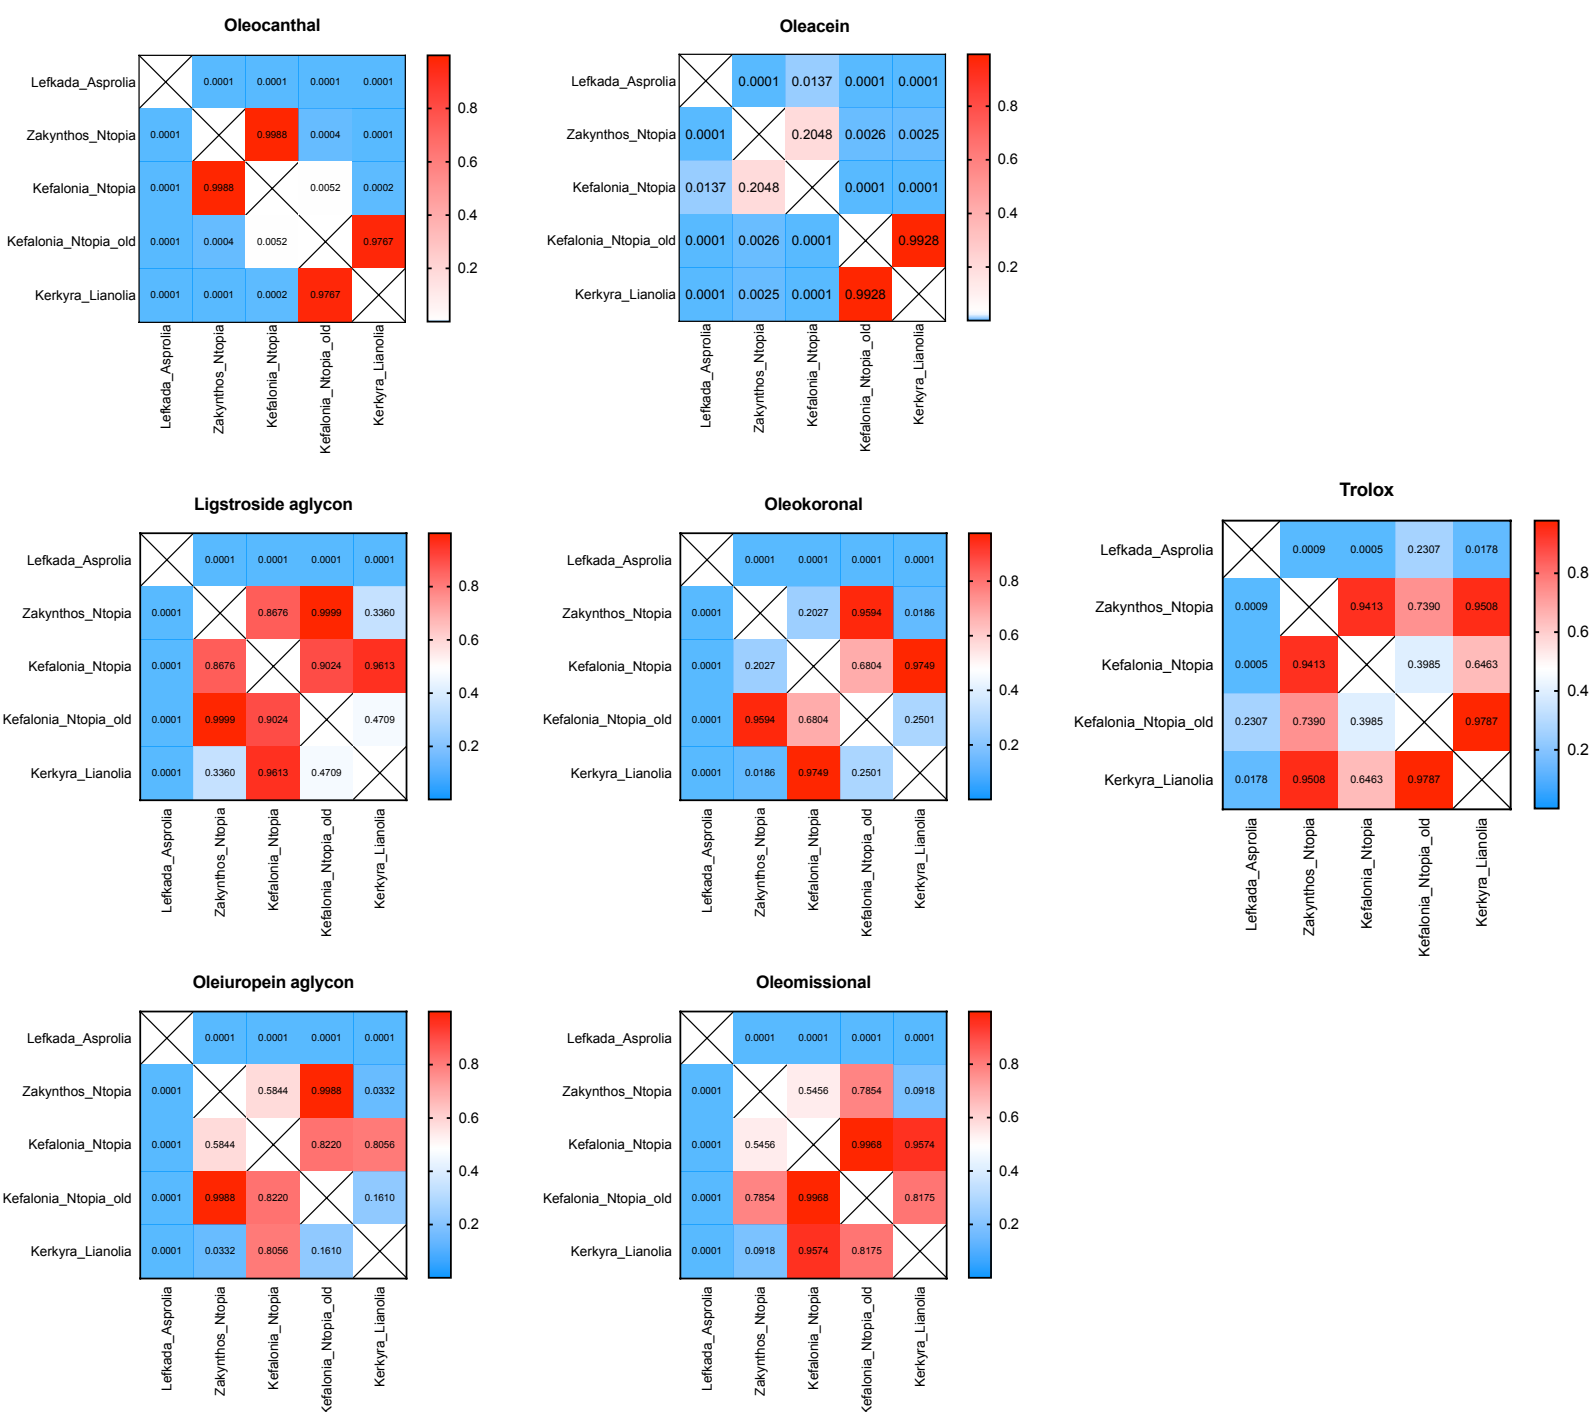

Supplement: s1 [file s1]

Supplementary Figure S1

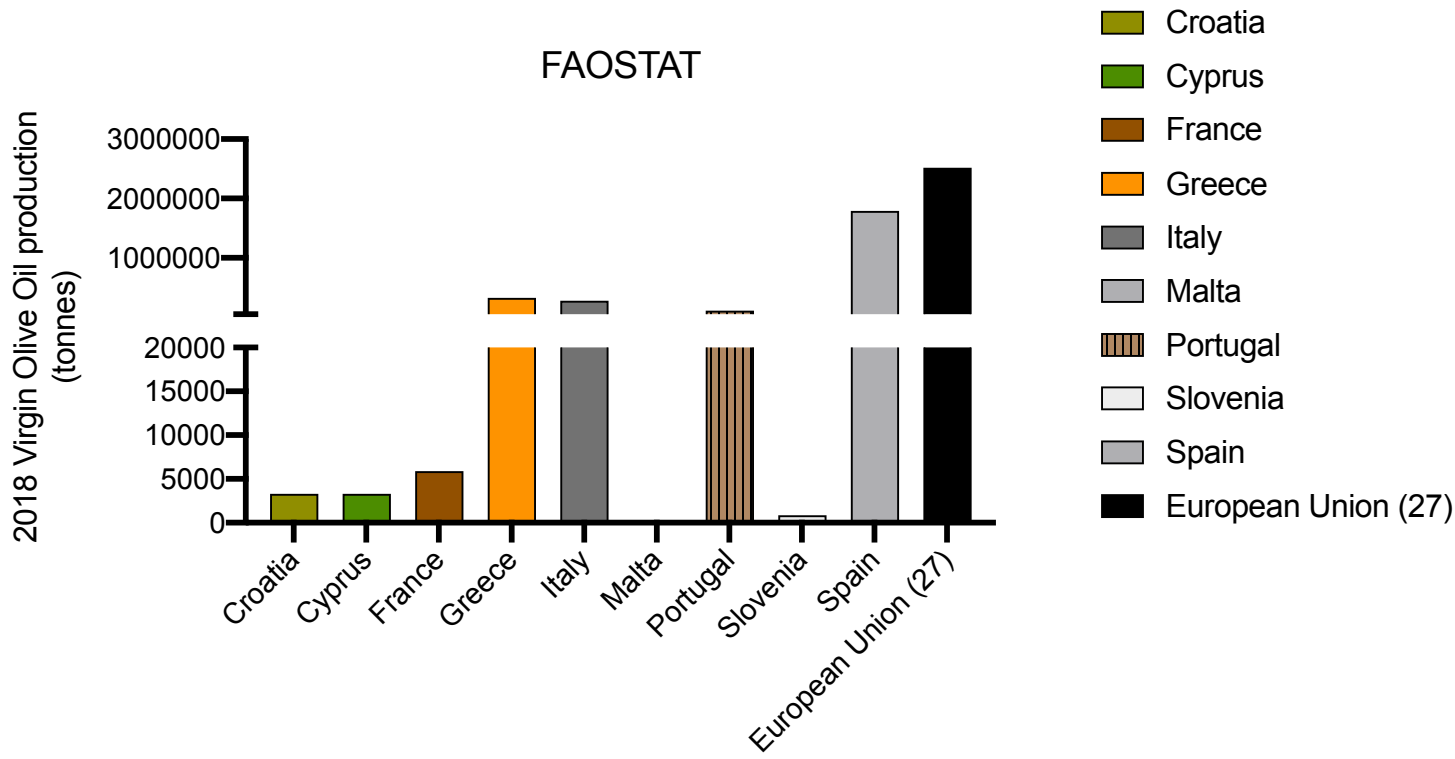

Supplement: s1 [file s1]
